# A plea for evidence in ecosystem service science: a framework and its application

Anne-Christine Mupepele & Carsten F. Dormann  
University of Freiburg

## Abstract

1 The ecosystem service concept is at the interface of ecology, economics and politics, with scientific  
2 results rapidly translated into management or political action. This emphasises the importance of  
3 **reliable recommendations** provided by scientist. We propose to use evidence-based practice in  
4 ecosystem service science in order to evaluate and improve the reliability of scientific statements.  
5 For this purpose, we introduce a level-of-evidence scale ranking study designs (e.g. review,  
6 case-control, descriptive) in combination with a study quality checklist. For illustration, the  
7 concept was directly applied to 12 case studies. We also review criticisms levered against  
8 evidence-based practice and how it applies to ecosystem services science. We further discuss who  
9 should use the evidence-based concept and suggest important next steps, with a focus on the  
10 development of guidelines for methods used in ecosystem service assessments.

11 Ecosystem services, the benefits humans derive from nature, have gained popularity over the past  
12 ten years (Raffaelli and White, 2013). The concept provides a common discussion ground in  
13 science-policy interaction (Daily *et al.*, 2009). Beside the positive aspects of increasing popularity and  
14 public attention, it runs the risk to serve as a buzzword boosting scientifically weak studies  
15 (Vihervaara *et al.*, 2010). To lend scientific credibility to the ecosystem services concept, we need to  
16 improve the scientific basis of ecosystem services, together with an increased awareness about the  
17 reliability of current results (Carpenter *et al.*, 2009; Boyd, 2013).

18 It was medicine that pioneered the evidence-based concept assessing the reliability of scientific  
19 statements and encouraging practitioners (doctors) to use only the most solid recommendations  
20 (Sackett *et al.*, 1996, Cochrane Collaboration - [www.cochrane.org](http://www.cochrane.org)). In evidence-based medicine,  
21 scientific results are ranked hierarchically according to their study design and quality (OCEBM Levels  
22 of Evidence Working Group, 2011). Such a scale permits the identification of the most reliable  
23 recommendation for diagnoses and treatments.

24 New concepts entail evaluation, and evidence-based practice has not stayed without criticism. We  
25 discuss the central arguments raised against evidence-based practice. Despite this criticism,  
26 evidence-based practice is successfully implemented and applied in medicine, today. The concept is  
27 also mentioned in other areas, including justice ([www.campbellcollaboration.org](http://www.campbellcollaboration.org)), economics (Reiss,  
28 2004) and environmental science such as conservation (Pullin and Knight, 2001, 2009; Sutherland *et al.*,  
29 2004) or forestry (Binkley and Menyailo, 2005; Petrokofsky *et al.*, 2011).

30 In environmental science the most relevant step towards an evidence-based practice were the  
31 introductions of the journals ‘Conservation Evidence’ in 2004 and ‘Environmental Evidence’ in 2011,  
32 by the Collaboration for Environmental Evidence ([www.environmentalevidence.org](http://www.environmentalevidence.org)). The editors were  
33 the first to transfer evidence-based medicine to conservation (Pullin and Knight, 2001). Discussions  
34 arose about the hierarchy of study designs that should be used in environmental science. Pullin and  
35 Knight (2001) and Petrokofsky *et al.* (2011) encouraged the use of a scale closely related to medicine,  
36 but this scale did not represent well the approaches normally used in environmental science.  
37 Sutherland *et al.* (2004) argue that we cannot use a hierarchy at all because conservation, and  
38 environmental science more generally, is less straightforward and less well resourced than medicine.  
39 Nevertheless these authors agree that the top of the hierarchy, the gold standard, is represented by  
40 systematic reviews, and therefore the Collaboration for Environmental Evidence highly emphasises  
41 the generation of systematic reviews (Pullin and Knight, 2009; Sutherland *et al.*, 2004; Petrokofsky  
42 *et al.*, 2011). Systematic reviews are not the only source of information for practitioners, scientists and  
43 policy makers and evidence-based practice involves tracking down the best available evidence with  
44 which to answer the question at hand (Sackett *et al.*, 1996).

45 Our aim is to propose a hierarchy and a quality checklist ranking the strength of evidence of  
46 common study designs in combination with quality criteria. These are valid for all environmental  
47 science studies. We further introduce evidence-based practice to ecosystem service science, which has  
48 not yet seen it in use. Scientists and decision makers should elucidate and transparently quantify the  
49 reliability of knowledge and thus the scientific basis for decisions taken. We give clear guidance on  
50 the terminology around evidence-based practice, to ensure that scientists and practitioner can  
51 communicate effectively across the disciplines and backgrounds. In the last section we provide  
52 examples for the application of the concept, respond to common criticism and offer suggestions for  
53 the next steps.

## 54 **The evidence-based concept**

55 The terminology used around evidence-based practice is diverse even in the medical field. However a  
56 well-defined terminology is essential for good communication between practitioners and scientists.

57 According to the Oxford English Dictionary, evidence is the available body of facts or information  
58 indicating whether a belief or proposition is true or valid  
59 ([www.oxforddictionaries.com/definition/english/evidence](http://www.oxforddictionaries.com/definition/english/evidence)). In other words, **evidence** is a measure for the  
60 knowledge behind a statement. The **strength of evidence** reflects the quality of our knowledge and  
61 we can identify whether a statement is based on **high or low evidence**, hence very reliable or hardly  
62 reliable. Following this argumentation, **evidence-based** practice means that actions are undertaken  
63 based on knowledge of the highest available reliability. It further means that if high evidence results  
64 are missing, the end-user is aware about the low reliability of the statement.

65 Evidence-based practice starts with a question or a purpose (Fig. 1). The way to the answer, i.e. to  
66 the outcome of the study, implies a study design. The study design is the set-up of the investigation,

67 e.g. controlled, correlative or observational. These study designs are not equally good, leading to  
 68 different strengths of evidence. In order to derive a level of evidence, we need a hierarchical scale  
 69 ranking study designs. Further the implementation of the design is important, and assessed in the  
 70 critical appraisal. Study designs with a high level of evidence can be implemented poorly. We provide  
 71 a quality checklist to derive the study quality further below. With help of the critical appraisal we  
 72 determine the final level of evidence, depending on the study design as well as on quality criteria.

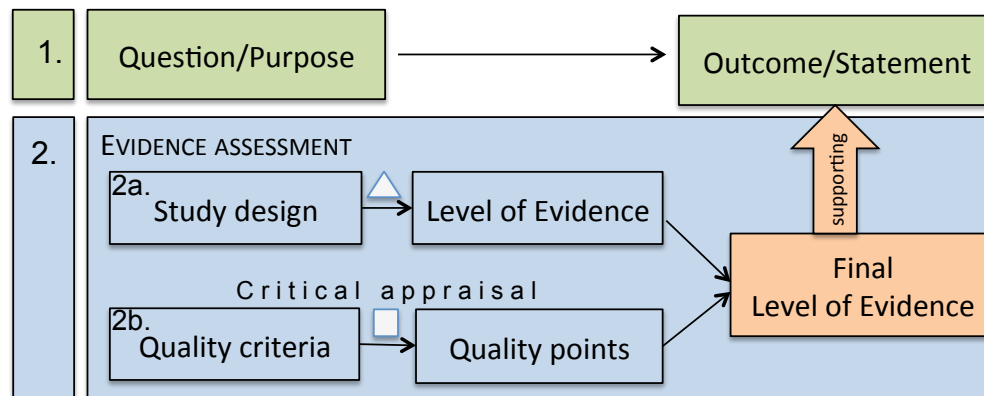

**Figure 1.** Schematic procedure in evidence-based practice: 1. Identification of question/purpose of the study and the outcome/statement, given as result of the study. 2. The assessment of the evidence supporting the outcome, with help of a level-of-evidence pyramid ( $\Delta$ ) and a quality checklist ( $\square$ ).

## 73 1. Question, outcome and the context

74 As in all of science the purpose of the investigation, ideally in form of a question, has to be clear. Still,  
 75 it is sometimes surprisingly challenging to ask a question correctly. For example, the question has to  
 76 fulfil certain criteria to be a well-focused and must be an answerable question (Higgins and Green,  
 77 2011; Collaboration for Environmental Evidence, 2013, p.20-23). For ecosystem service science, we  
 78 suggest in addition to the question the specification of the environment and the context. The  
 79 information *which* ecosystem service is investigated in *which* system is necessary to determine the  
 80 context for the validity of the answer. Ecosystem service science is interdisciplinary and combines  
 81 ecology, economy, politic and other social and natural sciences. In order to know which field we  
 82 operate in, it is recommended to determine the facet of the ecosystem services question:

- 83 1. **Quantification** of ecosystem services: the amount of an ecosystem service or a set of services.  
 84 It can be measured in absolute units or relative to another system.
- 85 2. **Valuation** of ecosystem services: the societal value of a service or a set of services. The most  
 86 common way is monetary valuation. Other possibilities are in relation to a reference system or  
 87 on a ranked scale (high, middle, low value).
- 88 3. **Management** of ecosystem services: the management/treatment of an ecosystem to favour  
 89 specific ecosystem services. For example leaving dead wood in forests to increase biodiversity or  
 90 reducing agricultural fertiliser to decrease nearby lake eutrophication.

91 4. **Governance** of ecosystem services: the strategy to steer a management type. The tools used are  
92 either incentives (subsidiaries) or penalties (law/tax).

93 Ideally these facets are investigated in the presented order starting with the quantification of an  
94 ecosystem service, which should then be valued. The most valuable services will be favoured by a  
95 well-adapted management option and in the end a governance strategy of how to steer the preferred  
96 type of management is implemented. Deviations of this structure are common, e.g. valuation does not  
97 necessarily require prior quantification. However, to cover the whole width of ecosystem service  
98 science, all four steps are required.

99 We have highlighted the question, context and facet. In an ecosystem services study, this is  
100 followed by the actual investigation. The outcome is usually the result of the study, it is the answer to  
101 the originally formulated question.

## 102 2. Evidence assessment

103 The outcome of an investigation can be of high or low reliability depending what was done to achieve  
104 the answer. The evidence assessment investigates the study design and the quality in order to  
105 determine the reliability of the outcome. In the following we present an evidence assessment not only  
106 for ecosystem service science, but also for all other environmental sciences.

### 107 Level-of-evidence pyramid

108 At the heart of evidence-based practice lies the hierarchy to rank the study designs (Fig. 2). The study  
109 design determines whether it yields high or low evidence. **Systematic reviews (LoE1a)** are at the top  
110 end of the level-of-evidence scale and provide the most reliable information. They summarise all  
111 information gained in several individual studies and are conducted according to strict guidelines (e.g.  
112 Collaboration for Environmental Evidence, 2013). Ideally they include quantitative measures, at best a  
113 meta-analysis (in the strict sense; see Borenstein *et al.*, 2009; Vetter *et al.*, 2013). Other more  
114 **conventional reviews (LoE1b)** may also include quantitative analysis or be purely qualitative. They  
115 both summarise the findings of several studies, but conventional reviews are less complete, not  
116 reproducible and often suffer more from publication bias.

117 The necessary condition for any review is that appropriate individual studies are available. The  
118 most reliable individual studies are **studies with a reference (LoE2)**. Typically, these are  
119 case-control or before-after control-impact studies. Method comparison can be useful for the  
120 valuation of ecosystem services, where no 'true' reference exists, however the results between both  
121 methods have to be consistent to provide high evidence.

122 Uncontrolled **correlative and regressive studies (LoE3)** are studies investigating for examples  
123 the influence of environmental variables on the quantity of an ecosystem service. **Descriptive**  
124 **studies, also called observational studies (LoE4)** present the data collected, sometimes in  
125 summary statistics or ordinations or they feed into simulation models. They are based on data, but not  
126 conducted in a controlled or correlative design.

127 The lowest level of evidence are statements that are **not based on any data (LoE5)**. These are  
128 usually anecdotes or expert opinions, the latter ones often not better than random (Tetlock, 2005).  
129 Even if their argumentation is a mechanism-based reasoning ('first principles': *A* works according to a  
130 certain mechanism, so we expect *B* to work in the same way), we cannot rely on these statements in  
131 the context of ecosystem services, where no first principles exist (Lawton, 1999).

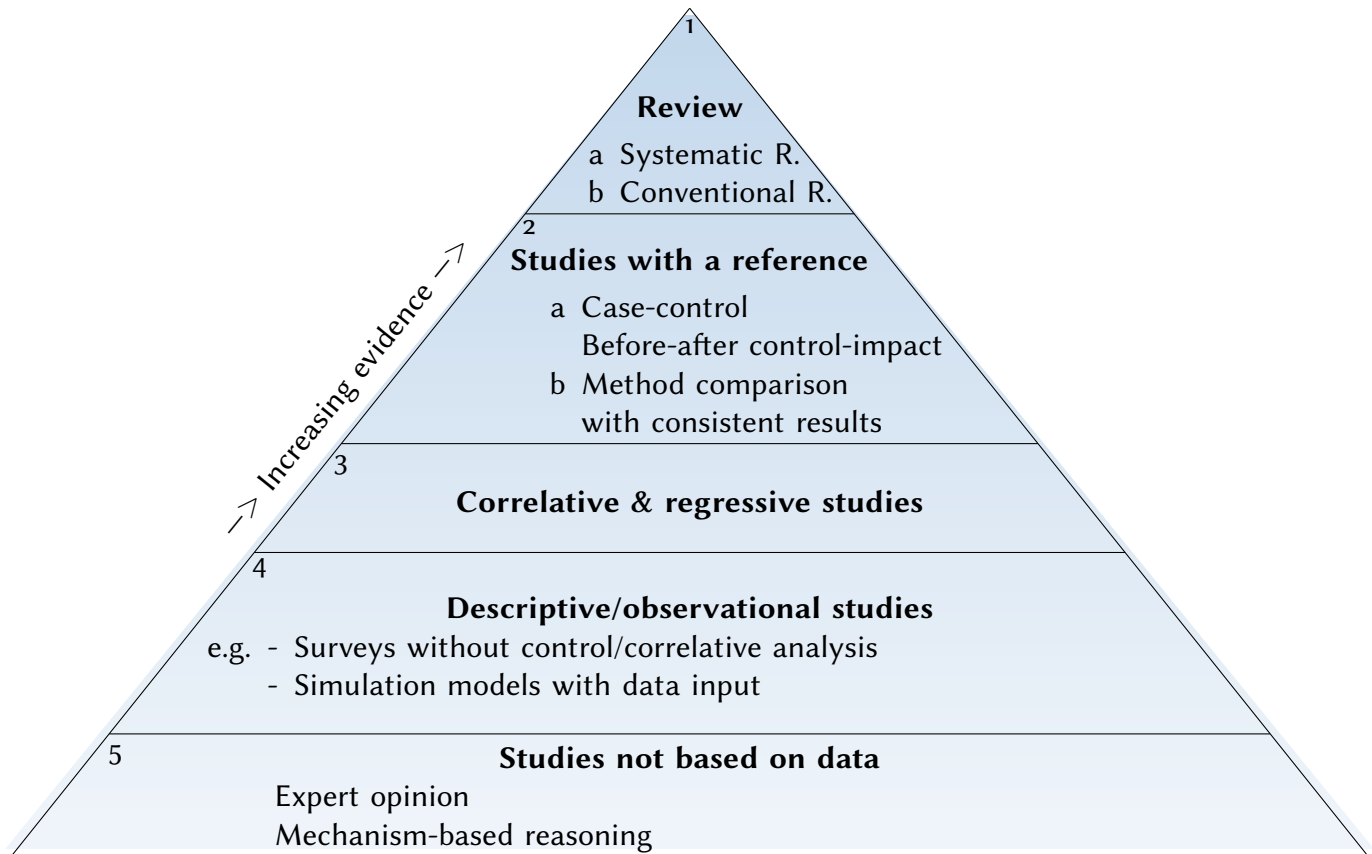

**Figure 2.** Level-of-evidence (LoE) pyramid ranking study designs according to their evidence. LoE1 - LoE5 with subcategories a and b.

132 It is important to note that 'method' and 'design' should not be confused. Methods are the means  
133 used to collect or analyse data, e.g. remote sensing, questionnaires, ordination techniques, model  
134 types. The design reflects how the study was planned and conducted, e.g. a case-control or descriptive  
135 design. For some methods, the underlying design is not easy to identify. Remote sensing for example  
136 can be done purely descriptive or with a valid reference such as ground-truthing or in a 'before-after'  
137 design. Most methods used in a descriptive design could actually follow a controlled design, but not  
138 necessarily do so.

### 139 **Critical appraisal**

140 The critical appraisal assesses the quality of the implementation of a study design. A study with a high  
141 evidence design may be poorly conducted. The critical appraisal identifies the study and reporting  
142 quality. It may lead to a correction of the level of evidence, so that the final level of evidence

143 supporting the outcome is lower than the one allocated according to the design. This depends on  
144 objective, sometimes design- or facet-specific criteria. Several literature sources provide lists with  
145 quality criteria (e.g. Rychetnik *et al.*, 2001; Pullin and Knight, 2003; Söderqvist and Soutukorva, 2006;  
146 Balshem *et al.*, 2011, Oxford Centre for Evidence-based medicine 2011 [www.cebm.net](http://www.cebm.net)). We combined  
147 these lists to a general quality checklist (Box 1). The checklist consists of 33 questions with the  
148 possibility to use only a subset if some questions are not appropriate for the specific context. All  
149 questions answered with yes receive one point (or two points if it is an important questions - in bold  
150 font in Box 1), and zero points if answered with no. In case of non-reported issues, we advice the  
151 answer 'no' to indicate a deficient reporting quality. The percentage of points received out of possible  
points will help to decide whether to downgrade the level of evidence.

|                          |                              |                                |
|--------------------------|------------------------------|--------------------------------|
| > 75% of total points    | -> no shortcomings           | -> no downgrading              |
| 50 - 75% of total points | -> shortcomings              | -> downgrading by one level    |
| 25 - 50% of total points | -> serious shortcomings      | -> downgrading by two levels   |
| < 25% of total points    | -> very serious shortcomings | -> downgrading by three levels |

152  
153 For example, if the first 17 questions of the checklist (Box 1) were answered, 10 of them - including  
154 the 3 bold ones - with 'yes' and 7 with 'no'. 13 out of 20 points (65%) were reached. 65% means that  
155 there are shortcomings and it is suggested to downgrade the study by one level of evidence.

156 We encourage the use of the checklist for an orientation, but we want to emphasise that this  
157 procedure can not be fully standardised. Quality aspects can also depend on the context of the study  
158 and the final judgement will remain with the user. Reviews provide information on the highest level  
159 of evidence and the critical appraisal is different from other designs, because they themselves are  
160 based on studies with lower evidence (see Box 1: section review). If only studies based on low  
161 evidence were included, the quality assessment should downgrade a review to LoE4 and if in addition  
162 other quality issues showed serious shortcomings even to LoE5.

## 163 **Application of the evidence-based concept**

164 The most popular application of the evidence-based concept is a systematic review that is used to  
165 summarise all knowledge available for a specific question. A systematic review is however time  
166 consuming and if policy makers need a specific answer in a shorter time, a 'rapid evidence assessment'  
167 (UK Civilservice, 2013) can be used as an alternative to a systematic review. Another approach to  
168 evidence-based practice are synopses. Synopses do not focus on a specific question but bring together  
169 information from a much broader topic, e.g. from a whole animal class, such as amphibians (Smith  
170 and Sutherland, 2014). A third possibility to use the evidence-based concept are guidelines to  
171 recommend tools/methods based on the best available evidence. These 'best practice guides' will focus  
172 on methods and the questions are therefore less typical systematic review questions, e.g. 'How much  
173 CO<sub>2</sub> is stored in European temperate forests?', but more like 'Which is the best method to measure  
174 CO<sub>2</sub> stored in temperate forests?' This serves to allow forest scientists to employ the best method to

175 any temperate forest. In the case of evidence-based ecosystem service science that would also identify  
176 the evidence base of common instruments and tools, e.g. INVEST (Tallis and Polasky, 2009). All these  
177 possibilities for the application of the evidence-based concept summarise individual studies and  
178 therefore require the evaluation of the evidence of individual studies included. In systematic reviews  
179 this is typically done as a step in the critical appraisal, but so far a scale and a clear guideline was  
180 missing. With the method described above we can assess the level of evidence of individual studies  
181 and in the following we provide several examples (more details in the supplement table S1 and S2).

## 182 **Examples of evidence-based practice**

183 ‘How does adding dead wood influence the provision of ecosystem services?’ was a question  
184 addressed by Acuña *et al.* (2013). They investigated two ecosystem services (food (fish) and retention  
185 of organic and inorganic matter) in a river-forest ecosystem in Spain and Portugal and studied the  
186 effect of a management intervention. Their study design followed a before-after control-impact  
187 approach, which is LoE2. The critical appraisal (see supplement table S2) revealed shortcomings: only  
188 14 out of 24 points (58%) were gained. The level of evidence was downgraded by one level to level  
189 three. We therefore conclude that the statement made by Acuña *et al.* (2013): ‘restoration of natural  
190 wood loading in streams increases the ecosystem service provision’ is based on LoE3. In addition they  
191 valued the ecosystem services, which is a subquestion of the study (‘What is the value of ecosystem  
192 services provided by streams?’). It can also be assessed for their evidence, which is especially  
193 important to guarantee multiple lines of evidence.

194 A second example is the governance-related question by Entenmann and Schmitt (2013): ‘Do  
195 stakeholders relate REDD+ to biodiversity conservation?’ They found that synergies between REDD+  
196 and biodiversity conservation were assumed by stakeholders. It is an observational design (LoE4),  
197 receiving only 10 of 20 quality points and therefore downgraded to LoE5.

198 The third example was a systematic review of Bowler *et al.* (2010), conducted according to the  
199 guidelines of the Collaboration for Environmental Evidence (2013). They investigated the effect of  
200 greening urban areas on the air temperature to mitigate heat exposure, a management-related  
201 question. They found that green space in an urban area is on average 1°C cooler, than a built-up site.  
202 According to the quality assessment the study achieved 24 out of 26 points (92%) and it therefore  
203 remained on the originally assigned highest LoE1a.

## 204 **Common criticisms**

205 Evidence-based practice (EBP) has faced criticism that we do not want to ignore. In the following, we  
206 discuss the most common arguments raised in evidence-based medicine and conservation (Straus and  
207 McAlister, 2000; Mullen and Streiner, 2004; Adams and Sandbrook, 2013).

### 208 *1. Cookbook problem*

209 *EBP is a cookbook approach denigrating professional expertise and replacing it with manualized*  
210 *procedures.* Best practice guidelines can not replace expertise of practitioners and best practice  
211 recommendations will highly profit of *additional* expertise, determining whether the evidence is  
212 applicable to a particular problem, bearing in mind unique circumstances (Mullen and Streiner, 2004).  
213 *2. EBP ignores individual variability*  
214 *EBP oversimplifies complex relations and denigrates individual variability (Sackett et al., 1996; Feinstein*  
215 *and Horwitz, 1997; Straus and McAlister, 2000; Gabbay and May, 2004; Mullen and Streiner, 2004).*  
216 Individual variability may overwhelm general patterns, making predictions useless. However,  
217 decision-making requires the identification of general patterns to predict an outcome. Predictions  
218 based on highest available evidence provide a higher probability to reach the desired outcome and are  
219 therefore better than any unproven alternative (Mullen and Streiner, 2004).  
220 *3. EPB ignores qualitative data*  
221 *EBP was accused to neglect qualitative data, such as local and indigenous knowledge (Adams and*  
222 *Sandbrook, 2013).* Quantitative data allow for more sensitive statistical testing and provide more  
223 information than categorical knowledge. However, qualitative data are much better than none at all  
224 and can add valuable information (Sale *et al.*, 2002). As Haddaway and Pullin (2013) point out: all  
225 evidence counts. All information contribute to systematic reviews to ascertain completeness.  
226 *4. No evidence that EBP works*  
227 *There is insufficient evidence that EBP works better than conventional approaches (Mullen and Streiner,*  
228 *2004).* EBP emerged from conventional practice over many years. Hence, there is no easy distinction  
229 between ‘the conventional approach’ and the evidence-based concept. Studies based on controlled or  
230 descriptive designs are sound scientific practice for centuries, and evidence-based research only  
231 emphasises to identify them as such. Still, we agree that the same rigour of reasoning should be  
232 applied, at a meta-level, to the concept of evidence, too. To date, too few data seem to exist to compare  
233 evidence-based decision-making with its more conventional cousin.  
234 *5. Environmental science is too complex for EBP*  
235 EBP works in medicine, but can not work in environmental science, because the socio-ecological  
236 system is more complex than a human body (Adams and Sandbrook, 2013). Complexity is not, in  
237 itself, a reason to abandon evidence. While certainly the medical research field is different from  
238 environmental studies, few physicians would agree that it is less complex. More importantly, however,  
239 the medical professional has typically hundreds to thousands of cases to learn from over a lifetime,  
240 while conservation ecologists work on only a very few cases. Thus, the setting for learning from  
241 experience is very different and would actually demand a more evidence-based approach to the more  
242 complex system (Gilovich *et al.*, 2002).  
243 *6. Time and resources demanding*  
244 *EBP requires a long time to conduct a systematic review.* While in general true, this argument is  
245 misleading (Straus and McAlister, 2000). As soon as a database with systematic reviews and  
246 best-practice guidelines exists (see e.g. the Cochrane Collaboration and the Collaboration for  
247 Environmental Evidence), practitioners take less time to find an answer to their question than before.



248 There is further criticisms specifically addressing meta-analyses and its methodological  
249 implementation (Thompson and Pocock, 1991; Bateman and Jones, 2003). We will not elaborate on  
250 methodological details, but understand that it is crucial to properly conduct and interpret  
251 meta-analysis results and refer to (Borenstein *et al.*, 2009, ch.43) for a detailed discussion of these  
252 aspects.

## 253 **Relevance for different user groups**

254 In the previous section we have elaborated *how* to employ the evidence-based concept. Now we want  
255 to provide a few notes on *who* should use it:

- 256 **1. Scientists conducting their own studies** have to be aware how to achieve the highest possible  
257 evidence, particularly during the planning phase. Choosing a study design that provides a good  
258 evidence and respects quality aspects will substantially increase the potential contribution to our  
259 knowledge.
- 260 **2. Scientists advising decision-makers** should be aware of the evidence of information they  
261 include in their recommendations. Weighting all scientific information equally, or subjectively, runs  
262 the risk of overconfidence and bias.
- 263 **3. Decision-makers** receiving information from scientists should demand a level-of-evidence  
264 statement for the information provided, or should judge themselves the reliability having in mind the  
265 evidence-based concept.
- 266 **4. We further would like to encourage consortia, international panels and learned societies,**  
267 **such as the Intergovernmental Platform on Biodiversity & Ecosystem Services (IPBES), EU**  
268 **projects or Ecological Societies (BES, ESA, INTECOL)** to develop guidelines with  
269 recommendations on methods to best quantify, value, manage or govern a desired ecosystem service  
270 or bundle of services. This would give decision-makers a toolbox, making the common procedure  
271 ('decision-makers seeking advice from individual scientists') superfluous. These 'best practice guides'  
272 ideally exist for every single and for the sum of ecosystem services in every facet and in every  
273 ecosystem. For example we may want to ask what is the best way to quantify recreation, to value  
274 recreation, to manage recreation and to use governance strategies that fosters sustainable recreation in  
275 a temperate forest. Each best practice guide would clearly state its level of evidence. At a higher level,  
276 where the sum of all ecosystem services in one ecosystem need to be evaluated, it would make sense to  
277 have a best practice guide on how to measure, say, the total (economic) value (e.g. summing individual  
278 values up with a strategy to avoid double-counting (Boyd and Banzhaf, 2007; DEFRA, 2007)). All this  
279 may sound unrealistic, given the huge number of methods, ecosystem services, management and  
280 governance options and so forth. However, in medicine, national and international learned societies  
281 set up assessment and guideline boards for exactly this purpose (often with governmental support, e.g.  
282 the UK's National Institute for Health and Care Excellence (NICE) [www.nice.org.uk](http://www.nice.org.uk) or Germany's  
283 IQWiG [www.Iqwig.de](http://www.Iqwig.de)). There are currently 261 recognised diseases with over 12000 sub-categories  
284 (ICD-10). This is certainly at the same scale as the challenges faced by ecosystem service science.

## 285 **Conclusion**

286 We introduced the evidence-based concept in ecosystem service science, encompassing a scale to  
287 judge the available evidence and a quality checklist to facilitate critical appraisal. We further showed  
288 in detail and illustrated with examples how to use the concept. Additional support and guidance can  
289 be obtained by the Collaboration of Environmental Evidence ([www.environmentalevidence.org](http://www.environmentalevidence.org)).

290 The evidence-based ecosystem service science does not suggest a specific management strategy. It  
291 is by no mean a contradiction or replacement to adaptive management or other management  
292 concepts. Rather, it complements these approaches, emphasising that whatever is used should be used  
293 with the awareness of how approved our knowledge is.

294 Wrong decisions can have strong negative consequences. This is particularly painful, if studies  
295 providing high evidence were available, but instead decisions were based on myth or low evidence  
296 studies. Taking again an example from medicine, child mortality from sudden child death was  
297 unnecessary high for decades due to wrong recommendations based on low evidence, ignoring the  
298 higher evidence available (Gilbert *et al.*, 2005). Especially on topics with various and contradicting  
299 opinions, it is important to continuously summarise and update the available evidence. If farmers  
300 have no reliable information on the management of natural pest control versus pesticides (Wright  
301 *et al.*, 2013), their actions may result in huge and avoidable economic loss or even directly affect  
302 human health.

303 It should have become clear that evidence-based ecosystem service science concerns scientists as  
304 well as decision-makers and the general public. In the interest of a responsible use of environmental  
305 resources and processes, we strongly encourage embracing evidence-based practice as paradigm for  
306 all research contributing to ecosystem service.

## 307 **Acknowledgements**

308 This work was supported by the 7th framework programme of the European Commission in the  
309 project 'Operational Potential of Ecosystem Research Applications' (OPERAs, grant number 308393).

**Box 1.** The **quality checklist** is designed in form of questions. Each question answered with ‘yes’ will receive a point, important aspects (bold type) two points. If a question is not appropriate in the specific context, it may be left out.

|                          |    |                                                                                                                                                                |
|--------------------------|----|----------------------------------------------------------------------------------------------------------------------------------------------------------------|
|                          | 1  | <b>Correspondence (Does the question match the answer?)</b>                                                                                                    |
|                          | 2  | Are the assumption used in the study reasonable?                                                                                                               |
|                          | 3  | Internal validity: Do design and implementation avoid a high risk of bias?                                                                                     |
|                          | 4  | External validity/relevance: Is the result transferable to other scenarios with the same context?                                                              |
|                          | 5  | Are multiple lines of evidence considered?                                                                                                                     |
| Data collection          | 6  | Was the target population/area defined in space, time and size?                                                                                                |
|                          | 7  | Was a sampling population defined? (Which population/area/ecosystem was sampled?)                                                                              |
|                          | 8  | Were potential differences between the target population and the sampling population considered?                                                               |
|                          | 9  | Were the methods described in sufficient detail to permit replication?                                                                                         |
|                          | 10 | Was the sample size appropriate?                                                                                                                               |
|                          | 11 | <b>Was probability sampling used for constructing the sample?</b>                                                                                              |
|                          | 12 | If secondary data are used, did an evaluation of the original data collection take place?                                                                      |
| Results Analysis         | 13 | Is the choice of statistical/analytical method justified and comprehensively explained?                                                                        |
|                          | 14 | Are variables and statistical measures given ?                                                                                                                 |
|                          | 15 | <b>Was accuracy/uncertainty assessed and reported?</b>                                                                                                         |
|                          | 16 | Are results consistent and homogeneous?                                                                                                                        |
|                          | 17 | Magnitude of effect: Is the effect large (and without large uncertainty)?                                                                                      |
|                          | 18 | Attrition bias: Are non-response/drop-outs given and is their impact discussed?                                                                                |
|                          |    | <b>Design-dependent aspects:</b>                                                                                                                               |
| Review                   | 19 | Is there a low probability of publication bias? E.g. results reporting a negative relationship were probably not included                                      |
|                          | 20 | <b>Is the review based on high evidence individual studies (several level 2 or level 3 studies)?</b>                                                           |
|                          | 21 | Validity - Do the studies included respond to the same question?                                                                                               |
|                          | 22 | Was the literature searched in a systematic way?                                                                                                               |
|                          | 23 | Was a meta-analysis (in the strict sense: see Borenstein <i>et al.</i> (2009)) included?                                                                       |
|                          | 24 | Were any other quantitative summary statistics provided?                                                                                                       |
| Studies with a reference | 25 | <b>Selection bias: Was the assignment of case-control groups randomized?</b>                                                                                   |
|                          | 26 | <b>Were groups designed equally, aside from the investigated point of interest?</b>                                                                            |
|                          | 27 | Performance bias: Was the sampling blinded, e.g. researchers taking samples of a specific area wouldn't know which differences are between these areas?        |
|                          | 28 | Were there sufficient replicates of treatment and reference groups?                                                                                            |
|                          |    | <b>Facet-dependent aspects:</b>                                                                                                                                |
| Valuation                | 29 | Were future values of ecosystem services considered?                                                                                                           |
|                          | 30 | If future values were considered, were they discounted with a well-motivated discount rate?                                                                    |
|                          | 31 | If aggregate economic values for a population were estimated, was this estimation consistent with the sampling procedure and the definition of the population. |
|                          | 32 | If valuation took place in form of a questionnaire, was the study pre-tested and piloted?                                                                      |

## References

- 310
- 311 Acuña V, Díez JR, Flores L, *et al.* 2013. Does it make economic sense to restore rivers for their  
312 ecosystem services? *Journal of Applied Ecology* **50**: 988–997.
- 313 Adams WM and Sandbrook C. 2013. Conservation, evidence and policy. *Oryx* **47**: 329–335.
- 314 Balshem H, Helfand M, Schunemann HJ, *et al.* 2011. GRADE guidelines 3: rating the quality of  
315 evidence - introduction. *Journal of Clinical Epidemiology* **64**: 401–406.
- 316 Bateman IJ and Jones AP. 2003. Contrasting conventional with multi-level modeling approaches to  
317 meta-analysis: Expectation consistency in U.K. woodland recreation values. *Land Economics* **79**:  
318 235–258.
- 319 Binkley D and Menyailo O. 2005. Gaining insights on the effects of tree species on soils. In: Tree  
320 Species Effects on Soils: Implications for Global Change, chapter 1, 1–16. Dordrecht: Kluwer  
321 Academic Publishers.
- 322 Borenstein M, Hedges LV, Higgins JPT, and Rothstein HR. 2009. Introduction to Meta-Analysis. John  
323 Wiley & Sons.
- 324 Bowler D, Buyung-Ali L, Healey JR, *et al.* 2010. The evidence base fo community forest management  
325 as a mechanism for supplying global environmental benefits and improving local welfare.  
326 *Collaboration for Environmental Evidence* **011**.
- 327 Boyd I. 2013. Research: A standard for policy-relevant science. *Nature* **501**: 159–160.
- 328 Boyd J and Banzhaf S. 2007. What are ecosystem services? The need for standardized environmental  
329 accounting units. *Ecological Economics* **63**: 616–626.
- 330 Carpenter SR, Mooney Ha, Agard J, *et al.* 2009. Science for managing ecosystem services: Beyond the  
331 Millennium Ecosystem Assessment. *Proceedings of the National Academy of Sciences of the United*  
332 *States of America* **106**: 1305–12.
- 333 Collaboration for Environmental Evidence. 2013. Guidelines for Systematic Review and Evidence  
334 Synthesis in Environmental Management. Technical Report March, Environmental Evidence.
- 335 Daily GC, Polasky S, Goldstein J, *et al.* 2009. Ecosystem services in decision making: time to deliver.  
336 *Frontiers in Ecology and the Environment* **7**: 21–28.
- 337 DEFRA. 2007. An introductory guide to valuing ecosystem services. URL  
338 <https://www.gov.uk/government/publications/an-introductory-guide-to-valuing-ecosystem-services>.
- 339 Entenmann SK and Schmitt CB. 2013. Actors' perceptions of forest biodiversity values and policy  
340 issues related to REDD plus implementation in Peru. *Biodiversity and Conservation* **22**: 1229–1254.

- 341 Feinstein AR and Horwitz RI. 1997. Problems in the 'Evidence' of 'Evidence-based Medicine'. *The*  
342 *American Journal of Medicine* **103**: 529–535.
- 343 Gabbay J and May A. 2004. Evidence based guidelines or collectively constructed 'mindlines?'. *BMJ*  
344 *(Clinical research ed)* **329**.
- 345 Gilbert R, Salanti G, Harden M, and See S. 2005. Infant sleeping position and the sudden infant death  
346 syndrome: systematic review of observational studies and historical review of recommendations  
347 from 1940 to 2002. *International Journal of Epidemiology* **34**: 874–87.
- 348 Gilovich T, Griffin D, and Kahneman D. 2002. Heuristics and Biases: The Psychology of Intuitive  
349 Judgment.
- 350 Haddaway N and Pullin AS. 2013. Evidence-based conservation and evidence-informed policy: a  
351 response to Adams & Sandbrook. *Oryx* **47**: 336–338.
- 352 Higgins JPT and Green S. 2011. Cochrane Handbook for Systematic Reviews of Interventions.
- 353 ICD-10. 2010. International Statistical Classification of Diseases and Related Health Problems,  
354 volume 2. World Health Organization.
- 355 Lawton JH. 1999. Are There General Laws in Ecology? *Oikos* **84**: 177–192.
- 356 Mullen EJ and Streiner DL. 2004. The Evidence for and against evidence-based practice. *Brief*  
357 *Treatment and Crisis Intervention* **4**: 111–121.
- 358 OCEBM Levels of Evidence Working Group. 2011. The Oxford Levels of Evidence 1. URL  
359 <http://www.cebm.net/index.aspx?o=5653>.
- 360 Petrokofsky G, Holmgren P, and Brown ND. 2011. Reliable forest carbon monitoring-systematic  
361 reviews as a tool for validating the knowledge base. *International Forestry Review* **13**: 56–66.
- 362 Pullin AS and Knight TM. 2001. Effectiveness in conservation practice: Pointers from medicine and  
363 public health. *Conservation Biology* **15**: 50–54.
- 364 Pullin AS and Knight TM. 2003. Support for decision making in conservation practice: an  
365 evidence-based approach. *Journal for Nature Conservation* **11**: 83–90.
- 366 Pullin AS and Knight TM. 2009. Doing more good than harm - Building an evidence-base for  
367 conservation and environmental management. *Biological Conservation* **142**: 931–934.
- 368 Raffaelli D and White PCL. 2013. Ecosystems and Their Services in a Changing World. Elsevier.
- 369 Reiss J. 2004. Evidence-based economics: issues and some preliminary answers. *Analyse and Kritik:*  
370 *Zeitschrift für Sozialtheorie* **26**: 346–363.

- 371 Rychetnik L, Frommer M, Hawe P, and Shiell A. 2001. Criteria for evaluation evidence on public  
372 health interventions. *Journal of Epidemiology and Community Health* **56**: 119–127.
- 373 Sackett DL, Rosenberg WMC, Gray JaM, *et al.* 1996. Evidence based medicine: what it is and what it  
374 isn't. *Clinical Orthopaedics and Related Research* **455**: 3–5.
- 375 Sale JEM, Lohfeld LH, and Brazil K. 2002. Revisiting the Quantitative-Qualitative Debate: Implications  
376 for Mixed-Methods Research. *Quality & Quantity* **36**: 43–53.
- 377 Smith RK and Sutherland WJ. 2014. Amphibian Conservation - Global evidence for the effects of  
378 interventions. Exeter: Pelagic Publishing.
- 379 Söderqvist T and Soutukorva A. 2006. An instrument for assessing the quality of environmental  
380 valuation studies. URL <http://www.naturvardsverket.se/Documents/publikationer/620-1252-5.pdf>.
- 381 Straus SE and McAlister FA. 2000. Evidence-based medicine: a commentary on common criticisms.  
382 *CMAJ* **163**: 837–841.
- 383 Sutherland WJ, Pullin AS, Dolman PM, and Knight TM. 2004. The need for evidence-based  
384 conservation. *Trends In Ecology & Evolution* **19**: 305–8.
- 385 Tallis H and Polasky S. 2009. Mapping and Valuing Ecosystem Services as an Approach for  
386 Conservation and Natural-Resource Management. *Annals of the New York Academy of Sciences*  
387 **1162**: 265–283.
- 388 Tetlock PE. 2005. Expert Political Judgment: How Good Is It? How Can We Know?
- 389 Thompson SG and Pocock SJ. 1991. Can meta-analyses be trusted? *The Lancet* **338**: 1127–1130.
- 390 UK Civilservice. 2013. What is a Rapid Evidence Assessment? URL  
391 <http://www.civilservice.gov.uk/networks/gsr/resources-and-guidance/rapid-evidence-assessment/what-is>.
- 392 Vetter D, Rucker G, and Storch I. 2013. Meta-analysis: A need for well-defined usage in ecology and  
393 conservation biology. *Ecosphere* **4**: art74.
- 394 Vihervaara P, Rönkä M, and Walls M. 2010. Trends in Ecosystem Service Research: Early Steps and  
395 Current Drivers. *Ambio* **39**: 314–324.
- 396 Wright H, Ashpole JE, Dicks LV, *et al.* 2013. Enhancing natural pest control as an ecosystem service:  
397 Evidence for the effects of selected actions. Cambridge: University of Cambridge.
